# Supplementary material for: Behaviour of cation–pi interaction in presence of external electric field
Source: Royal Society of Chemistry journal article supplement (doi:10.1039/c6ra21334k), 2016-01-01
Supplement: c6ra21334k1.pdf [file c6ra21334k1.pdf]

## **Behaviour of Cation- $\pi$ Interaction in presence of External Electric Field**

**Nabajit Sarmah and Pradip Kr. Bhattacharyya\***

RSC advances

Supplementary material

**Table S1** Interaction energy (in kcal/mol) for benzene-Na<sup>+</sup> in presence of external electric field at different level of theories.

| Field Strength (in au) | B3lyp   |         |             |             |                | MP2     |         |             |             |                |
|------------------------|---------|---------|-------------|-------------|----------------|---------|---------|-------------|-------------|----------------|
|                        | cc-pVDZ | cc-pVTZ | Aug-cc-pVDZ | Aug-cc-pVTZ | 6311+g (2d,2p) | cc-pVDZ | cc-pVTZ | Aug-cc-pVDZ | Aug-cc-pVTZ | 6311+g (2d,2p) |
| 0.03                   | -57.23  | -58.70  | -58.66      | -58.78      | -59.11         | -53.54  | -55.69  | -56.24      | -54.88      | -55.21         |
| 0.0275                 | -54.51  | -55.87  | -55.74      | -55.94      | -56.17         | -50.99  | -52.58  | -53.49      | -52.69      | -52.52         |
| 0.025                  | -51.83  | -53.03  | -52.84      | -53.09      | -53.33         | -48.42  | -49.93  | -50.75      | -49.99      | -49.84         |
| 0.0225                 | -49.12  | -50.26  | -49.97      | -50.26      | -50.47         | -45.85  | -47.28  | -48.01      | -47.29      | -47.15         |
| 0.02                   | -46.85  | -47.40  | -47.81      | -47.46      | -47.59         | -43.30  | -44.60  | -45.25      | -44.59      | -44.46         |
| 0.0175                 | -43.69  | -44.59  | -44.20      | -44.58      | -44.75         | -40.72  | -41.93  | -42.49      | -41.88      | -41.74         |
| 0.015                  | -41.04  | -41.80  | -41.33      | -41.71      | -41.89         | -38.13  | -39.22  | -39.71      | -39.17      | -39.04         |
| 0.0125                 | -38.31  | -38.85  | -38.42      | -38.85      | -38.99         | -35.52  | -36.48  | -36.90      | -36.41      | -36.25         |
| 0.01                   | -35.57  | -35.93  | -35.49      | -35.93      | -36.03         | -32.89  | -33.76  | -34.05      | -33.65      | -33.48         |
| 0.0075                 | -32.76  | -33.00  | -32.51      | -32.97      | -32.94         | -29.93  | -30.93  | -31.16      | -30.78      | -30.64         |
| 0.005                  | -29.90  | -30.01  | -29.47      | -29.92      | -30.00         | -27.26  | -28.03  | -28.18      | -27.87      | -27.72         |
| 0.0025                 | -27.00  | -26.90  | -26.36      | -26.81      | -26.92         | -24.54  | -25.06  | -25.10      | -24.88      | -24.71         |
| 0                      | -23.95  | -23.69  | -23.10      | -23.58      | -23.69         | -21.75  | -21.93  | -21.90      | -21.76      | -20.97         |

**Table S2 (a)** Calculated BSSE values (in kcal/mol) for benzene-Li<sup>+</sup> in presence of external electric field at different level of theories.

| Field strength (in au) | B3lyp  |        |            |            |                | MP2    |        |            |            |                |
|------------------------|--------|--------|------------|------------|----------------|--------|--------|------------|------------|----------------|
|                        | ccpvDz | ccpvTZ | Aug-ccpvDz | Aug-ccpvTZ | 6311+g (2d,2p) | ccpvDz | ccpvTZ | Aug-ccpvDz | Aug-ccpvTZ | 6311+g (2d,2p) |
| 0.03                   | 6.774  | 3.961  | 0.737      | 0.330      | 0.557          | 9.587  | 5.643  | 2.171      | 1.077      | 2.340          |
| 0.0275                 | 5.879  | 3.364  | 0.649      | 0.320      | 0.522          | 8.665  | 5.018  | 2.078      | 1.005      | 2.221          |
| 0.025                  | 5.095  | 2.848  | 0.601      | 0.311      | 0.492          | 7.858  | 4.469  | 2.017      | 0.969      | 2.130          |
| 0.0225                 | 4.413  | 2.401  | 0.571      | 0.302      | 0.465          | 7.151  | 3.988  | 1.973      | 0.945      | 2.055          |
| 0.02                   | 3.814  | 2.015  | 0.552      | 0.293      | 0.442          | 6.533  | 3.566  | 1.939      | 0.927      | 1.993          |
| 0.0175                 | 3.292  | 1.684  | 0.539      | 0.288      | 0.427          | 5.994  | 3.198  | 1.911      | 0.911      | 1.937          |
| 0.015                  | 2.840  | 1.402  | 0.529      | 0.284      | 0.417          | 5.525  | 2.877  | 1.887      | 0.895      | 1.885          |
| 0.0125                 | 2.450  | 1.163  | 0.521      | 0.282      | 0.411          | 5.119  | 2.600  | 1.866      | 0.880      | 1.799          |
| 0.01                   | 2.118  | 0.964  | 0.514      | 0.279      | 0.407          | 4.771  | 2.361  | 1.846      | 0.865      | 1.788          |
| 0.0075                 | 1.840  | 0.800  | 0.508      | 0.276      | 0.404          | 4.476  | 2.157  | 1.826      | 0.849      | 1.741          |
| 0.005                  | 1.608  | 0.670  | 0.501      | 0.273      | 0.402          | 4.230  | 1.985  | 1.806      | 0.832      | 1.692          |
| 0.0025                 | 1.423  | 0.569  | 0.494      | 0.269      | 0.401          | 4.020  | 1.843  | 1.786      | 0.814      | 0.000          |
| 0                      | 1.279  | 0.496  | 0.000      | 0.265      | 0.400          | 3.848  | 1.722  | 1.764      | 0.794      | 1.590          |
| -0.0025                | 1.171  | 0.448  | 0.478      | 0.260      | 0.400          | 3.707  | 1.626  | 1.739      | 0.772      | 1.531          |
| -0.005                 | 1.097  | 0.423  | 0.468      | 0.255      | 0.399          | 3.586  | 1.548  | 1.707      | 0.747      | 1.467          |
| -0.0075                | 1.056  | 0.419  | 0.457      | 0.249      | 0.399          | 3.476  | 1.484  | 1.665      | 0.717      | 1.391          |
| -0.01                  | 1.037  | 0.436  | 0.466      | 0.245      | 0.397          | 3.353  | 1.426  | 1.598      | 0.679      | 1.293          |

**Table S2 (b)** Calculated BSSE values (in kcal/mol) for benzene-Na<sup>+</sup> in presence of external electric field at different level of theories.

| Field strength (in au) | B3lyp  |        |            |            |                | MP2    |        |            |            |                |
|------------------------|--------|--------|------------|------------|----------------|--------|--------|------------|------------|----------------|
|                        | ccpvDz | ccpvTZ | Aug-ccpvDz | Aug-ccpvTZ | 6311+g (2d,2p) | ccpvDz | ccpvTZ | Aug-ccpvDz | Aug-ccpvTZ | 6311+g (2d,2p) |
| 0.03                   | 7.634  | 4.011  | 0.999      | 0.471      | 0.915          | 9.728  | 4.969  | 1.757      | 1.110      | 1.985          |
| 0.0275                 | 6.617  | 3.390  | 0.975      | 0.414      | 0.870          | 8.689  | 4.783  | 1.694      | 1.025      | 1.829          |
| 0.025                  | 5.714  | 2.842  | 0.95       | 0.377      | 0.834          | 7.772  | 4.216  | 1.644      | 0.995      | 1.738          |
| 0.0225                 | 4.937  | 2.393  | 0.933      | 0.339      | 0.806          | 6.965  | 3.724  | 1.602      | 0.97       | 1.667          |
| 0.02                   | 3.832  | 1.999  | 0.916      | 0.314      | 0.780          | 6.260  | 3.298  | 1.569      | 0.54       | 1.607          |
| 0.0175                 | 3.649  | 1.659  | 0.9        | 0.304      | 0.767          | 5.636  | 2.928  | 1.540      | 0.94       | 1.554          |
| 0.015                  | 3.120  | 1.374  | 0.885      | 0.293      | 0.753          | 5.088  | 2.609  | 1.515      | 0.927      | 1.504          |
| 0.0125                 | 2.664  | 1.151  | 0.867      | 0.287      | 0.730          | 4.608  | 2.335  | 1.490      | 0.915      | 1.456          |
| 0.01                   | 2.266  | 0.944  | 0.851      | 0.282      | 0.737          | 4.189  | 2.099  | 1.465      | 0.904      | 1.408          |
| 0.0075                 | 1.932  | 0.793  | 0.829      | 0.277      | 0.718          | 3.824  | 1.901  | 1.439      | 0.891      | 1.358          |
| 0.005                  | 1.660  | 0.684  | 0.81       | 0.274      | 0.705          | 3.511  | 1.735  | 1.410      | 0.87       | 1.307          |
| 0.0025                 | 1.429  | 0.583  | 0.796      | 0.270      | 0.697          | 3.235  | 1.596  | 1.393      | 0.846      | 1.255          |
| 0                      | 1.232  | 0.525  | 0.774      | 0.267      | 0.689          | 2.994  | 1.532  | 1.362      | 0.824      | 1.229          |

**Table S3** Charge transfer for benzene-Li<sup>+</sup> and benzene-Na<sup>+</sup> in presence of external electric field at different level of theories.

| Field strength<br>(in au) | B3lyp/ccpvDZ            |                         | B3lyp/ccpvTZ            |                         | B3lyp/6311+g(2d,2p)     |                         |
|---------------------------|-------------------------|-------------------------|-------------------------|-------------------------|-------------------------|-------------------------|
|                           | benzene-Li <sup>+</sup> | benzene-Na <sup>+</sup> | benzene-Li <sup>+</sup> | benzene-Na <sup>+</sup> | benzene-Li <sup>+</sup> | benzene-Na <sup>+</sup> |
| 0.03                      | 0.2756                  | 0.1625                  | 0.2746                  | 0.1589                  | 0.2806                  | 0.1620                  |
| 0.0275                    | 0.2562                  | 0.1442                  | 0.2562                  | 0.1416                  | 0.2628                  | 0.1461                  |
| 0.025                     | 0.2375                  | 0.1280                  | 0.2387                  | 0.1261                  | 0.2458                  | 0.1318                  |
| 0.0225                    | 0.2197                  | 0.1133                  | 0.2220                  | 0.1119                  | 0.2294                  | 0.1189                  |
| 0.02                      | 0.2027                  | -0.0987                 | 0.2062                  | 0.0991                  | 0.2094                  | 0.1073                  |
| 0.0175                    | 0.1863                  | 0.0878                  | 0.1910                  | 0.0874                  | 0.1951                  | 0.0966                  |
| 0.015                     | 0.1706                  | 0.0767                  | 0.1764                  | 0.0767                  | 0.1815                  | 0.0869                  |
| 0.0125                    | 0.1555                  | 0.0667                  | 0.1627                  | 0.0669                  | 0.1684                  | 0.0780                  |
| 0.01                      | 0.1409                  | 0.0575                  | 0.1494                  | 0.0579                  | 0.1560                  | 0.0644                  |
| 0.0075                    | 0.1269                  | 0.0491                  | 0.1365                  | 0.0497                  | 0.1438                  | 0.0630                  |
| 0.005                     | 0.1133                  | 0.0415                  | 0.1243                  | 0.0423                  | 0.1338                  | 0.0557                  |
| 0.0025                    | 0.1003                  | 0.0346                  | 0.1125                  | 0.0357                  | 0.1223                  | 0.0489                  |
| 0                         | 0.0875                  | 0.0284                  | 0.1015                  | 0.0299                  | 0.1109                  | 0.1620                  |
| -0.0025                   | 0.0750                  |                         | 0.0901                  |                         | 0.1000                  |                         |
| -0.005                    | 0.0630                  |                         | 0.0792                  |                         | 0.0955                  |                         |
| -0.0075                   | 0.0514                  |                         | 0.0684                  |                         | 0.0781                  |                         |
| -0.01                     | 0.0391                  |                         | 0.0499                  |                         | 0.0665                  |                         |

**Table S4 (a)** Thermochemical data for benzene-Li<sup>+</sup> system (in kcal/mol) in presence of external electric field at different level of theories.

| Field strength (in au) | B3lyp/ccpvDZ      |                   | B3lyp/ccpvTZ      |                   |
|------------------------|-------------------|-------------------|-------------------|-------------------|
|                        | $\Delta G_{comp}$ | $\Delta H_{comp}$ | $\Delta G_{comp}$ | $\Delta H_{comp}$ |
| -0.01                  | -20               | -27               | -19               | 24                |
| -0.0075                | -22               | -30               | -22               | -30               |
| -0.005                 | -25               | -33               | -25               | -33               |
| -0.0025                | -27               | -36               | -27               | -36               |
| 0                      | -39               | -29               | 0                 | 0                 |
| 0.0025                 | -32               | -41               | -32               | -41               |
| 0.005                  | -35               | -43               | -35               | -43               |
| 0.0075                 | -37               | -46               | -37               | -46               |
| 0.01                   | -40               | -49               | -39               | -48               |
| 0.125                  | -42               | -51               | -42               | -51               |
| 0.015                  | -45               | -54               | -44               | -53               |
| 0.0175                 | -48               | -56               | -47               | -56               |
| 0.02                   | -50               | -59               | -49               | -58               |
| 0.0225                 | -53               | -62               | -52               | -61               |
| 0.025                  | -56               | -65               | -54               | -63               |
| 0.0275                 | -59               | -68               | -57               | -66               |
| 0.03                   | -62               | -71               | -59               | -69               |

**Table S4 (b)** Thermochemical data for benzene-Na<sup>+</sup> (in kcal/mol) system in presence of external electric field at different level of theories.

| Field strength<br>(in au) | B3lyp/ccpvDZ      |                   | B3lyp/ccpvTZ      |                   | B3lyp/6311+g(2d,2p) |                   |
|---------------------------|-------------------|-------------------|-------------------|-------------------|---------------------|-------------------|
|                           | $\Delta G_{comp}$ | $\Delta H_{comp}$ | $\Delta G_{comp}$ | $\Delta H_{comp}$ | $\Delta G_{comp}$   | $\Delta H_{comp}$ |
| 0                         | -17               | -27               | -16               | -24               | -17                 | -24               |
| 0.0025                    | -20               | -28               | -19               | -27               | -20                 | -27               |
| 0.005                     | -23               | -31               | -22               | -30               | -23                 | -30               |
| 0.0075                    | -26               | -34               | -25               | -33               | -26                 | -33               |
| 0.01                      | -6                | -61               | -28               | -36               | -29                 | -36               |
| 0.125                     | -33               | -40               | -31               | -39               | -32                 | -39               |
| 0.015                     | -36               | -44               | -35               | -43               | -34                 | -42               |
| 0.0175                    | 7                 | -47               | 8                 | 0                 | -46                 | -45               |
| 0.02                      | -42               | -50               | -41               | -49               | -40                 | -48               |
| 0.0225                    | -45               | -54               | -44               | -52               | -43                 | -51               |
| 0.025                     | -49               | -57               | -47               | -55               | -46                 | -54               |
| 0.0275                    | -52               | -61               | -50               | -59               | -49                 | -56               |
| 0.03                      | -56               | -64               | -54               | -62               | -52                 | -59               |

**Table S5**  $d_{M-X}$  distance (in Å) for benzene- $\text{Na}^+$  system in presence of external electric field in different level of theory

| Field strength<br>(in au) | B3lyp      |            |               | MP2        |            |               |
|---------------------------|------------|------------|---------------|------------|------------|---------------|
|                           | Aug-ccpvDz | Aug-ccpvTZ | 6311+g(2d,2p) | Aug-ccpvDz | Aug-ccpvTZ | 6311+g(2d,2p) |
| 0.03                      | 2.1116     | 2.0954     | 2.0934        | 2.1507     | 2.1210     | 2.1260        |
| 0.0275                    | 2.1250     | 2.1091     | 2.1058        | 2.1662     | 2.1409     | 2.1410        |
| 0.025                     | 2.1402     | 2.1239     | 2.1219        | 2.1830     | 2.1575     | 2.1574        |
| 0.0225                    | 2.1566     | 2.1418     | 2.1384        | 2.2008     | 2.1757     | 2.1751        |
| 0.02                      | 2.1752     | 2.1592     | 2.1553        | 2.2209     | 2.1950     | 2.1946        |
| 0.0175                    | 2.1954     | 2.1726     | 2.1757        | 2.2426     | 2.2165     | 2.2155        |
| 0.015                     | 2.2173     | 2.2031     | 2.1976        | 2.2663     | 2.2397     | 2.2385        |
| 0.0125                    | 2.2413     | 2.2251     | 2.2210        | 2.2924     | 2.2649     | 2.2639        |
| 0.01                      | 2.2685     | 2.2514     | 2.2400        | 2.3213     | 2.2943     | 2.2931        |
| 0.0075                    | 2.2984     | 2.2812     | 2.2757        | 2.3213     | 2.3267     | 2.3253        |
| 0.005                     | 2.3320     | 2.3162     | 2.3108        | 2.3547     | 2.3622     | 2.3617        |
| 0.0025                    | 2.3711     | 2.3552     | 2.3484        | 2.3909     | 2.4045     | 2.4018        |
| 0                         | 2.4188     | 2.3957     | 2.3774        | 2.4861     | 2.4475     | 2.4467        |
